# Supplementary material for: Energy and economic advantages of simultaneous hydrogen and biogas production in microbial electrolysis cells as a function of the applied voltage and biomass content
Source: Royal Society of Chemistry journal article supplement (doi:10.1039/d0se01797c), 2021-01-01
Supplement: d0se01797c1.pdf [file d0se01797c1.pdf]

## SUPPLEMENTARY INFORMATION

### Energy and economic advantages of simultaneous hydrogen and biogas production in microbial electrolysis cells as a function of the applied voltage and biomass content

Ariadna Segundo-Aguilar,<sup>a</sup> Linda V. González-Gutiérrez,<sup>a</sup> Victor Climent Payá,<sup>b</sup> Juan Feliu,<sup>b</sup> Germán Buitrón,<sup>c</sup> and Bibiana Cercado<sup>a\*</sup>

<sup>a</sup>Centro de Investigación y Desarrollo Tecnológico en Electroquímica S.C. Parque Tecnológico Querétaro Sanfandila, 76703, Pedro Escobedo, Querétaro, Mexico.

<sup>b</sup>Universidad de Alicante. Instituto Universitario de Electroquímica. Campus de Sant Vicent del Raspeig. Apt. 99 E-03080 Alacant, Spain

<sup>c</sup>Laboratorio de Investigación en Procesos Avanzados de Tratamiento de Aguas, Unidad Académica Juriquilla, Instituto de Ingeniería, Universidad Nacional Autónoma de México, Campus Juriquilla, UNAM. Blvd. Juriquilla No. 3001, 76230 Querétaro, Mexico.

\*Corresponding author.

E-mail address: bcercado@cideteq.mx (B. Cercado)

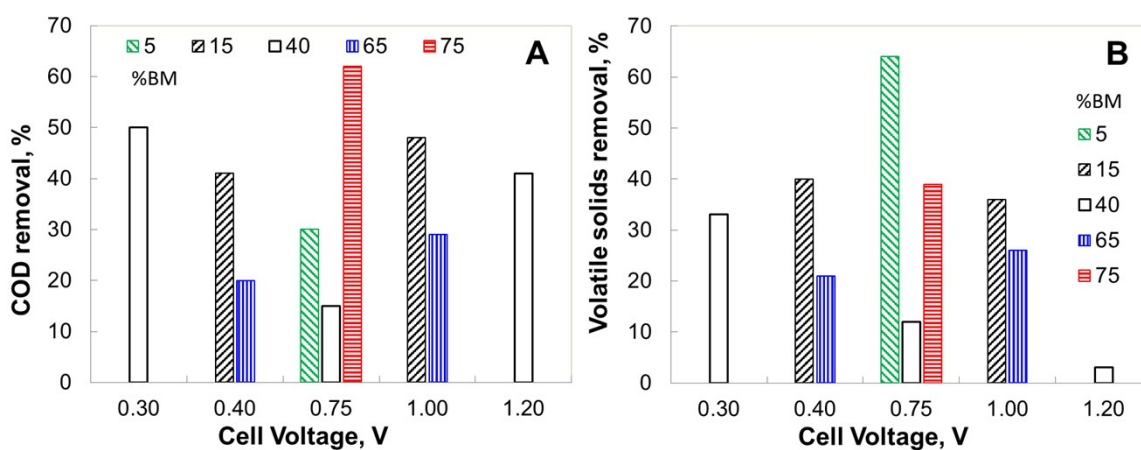

**Figure S1** Organics removal in the anodic chamber of MECs as a function of the cell voltage and percentage of biomass (%BM).

**Table S1.** COD mass balance for the anodic chamber of MECs installed with carbon felt in fermenter effluents at various combinations of voltage and biomass content.

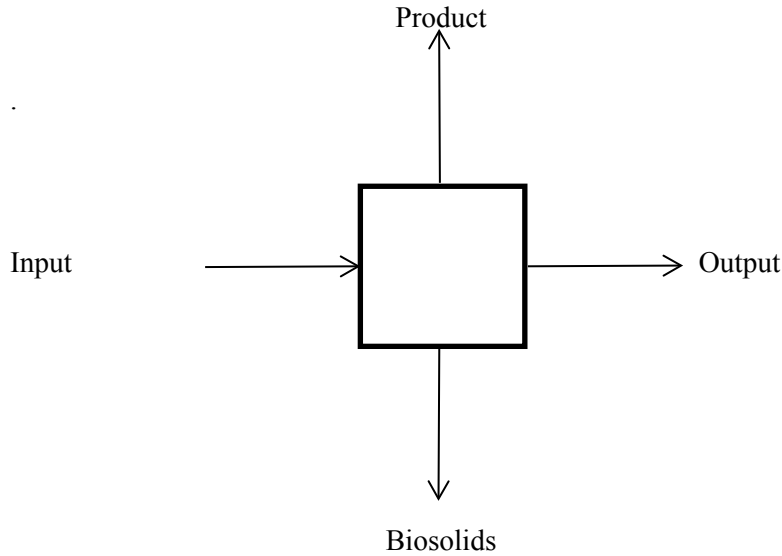

| MEC                              | Biogas       | CH <sub>4</sub>  | CO <sub>2</sub> | Biogas     | CH <sub>4</sub> | CO <sub>2</sub> | CH <sub>4</sub> | CO <sub>2</sub> |
|----------------------------------|--------------|------------------|-----------------|------------|-----------------|-----------------|-----------------|-----------------|
|                                  | mL           | %                | %               | g          | g               | g               | g-COD           | g-COD           |
| 0.43V-65%                        | 29           | 86.8             | 13.2            | 0.035      | 0.0302          | 0.0046          | 0.1208          | 0               |
| 1.06V-65%                        | 30           | 75.2             | 24.8            | 0.036      | 0.0271          | 0.0089          | 0.1083          | 0               |
| 0.75V-75%                        | 33           | 69.2             | 30.8            | 0.040      | 0.0274          | 0.0122          | 0.1096          | 0               |
|                                  | Initial SCOD | Final SCOD       | Initial SCOD    | Final SCOD |                 |                 |                 |                 |
|                                  | g/L          | g/L              | g               | g          |                 |                 |                 |                 |
| 0.43V-65%                        | 11.64        | 3.12             | 1.57            | 0.42       |                 |                 |                 |                 |
| 1.06V-65%                        | 11.64        | 3.18             | 1.57            | 0.43       |                 |                 |                 |                 |
| 0.75V-75%                        | 10.67        | 6.7              | 1.44            | 0.90       |                 |                 |                 |                 |
|                                  | VS-initial   | VS-initial       | VS-initial      | VS-final   | VS-final        | VS-final        |                 |                 |
|                                  | g/L          | g                | g-COD           | g/L        | g               | g-COD           |                 |                 |
| 0.43V-65%                        | 11.006       | 1.49             | 2.53            | 8.672      | 1.171           | 1.990           |                 |                 |
| 1.06V-65%                        | 11.006       | 1.49             | 2.53            | 8.188      | 1.105           | 1.879           |                 |                 |
| 0.75V-75%                        | 12.75        | 1.72             | 2.93            | 7.739      | 1.045           | 1.776           |                 |                 |
| Gas density                      | 1.2          | g/L              |                 |            |                 |                 |                 |                 |
| Reactor volume                   | 0.135        | L                |                 |            |                 |                 |                 |                 |
| g COD/mol CH <sub>4</sub>        | 64           | g                |                 |            |                 |                 |                 |                 |
| g COD/mol CO <sub>2</sub>        | 0            | g                |                 |            |                 |                 |                 |                 |
| Molecular weight CH <sub>4</sub> | 16           | g/mol            |                 |            |                 |                 |                 |                 |
| g COD/g VS                       | 1.7          | secondary sludge |                 |            |                 |                 |                 |                 |
| L CH <sub>4</sub> /g COD         | 0.35         | Standard yield   |                 |            |                 |                 |                 |                 |

|                    |                     | <b>0.43V-65%</b> | <b>1.06V-65%</b> | <b>0.75V-75%</b> |  |
|--------------------|---------------------|------------------|------------------|------------------|--|
| Input, g-COD       | COD-anolyte         | 1.57             | 1.57             | 1.44             |  |
|                    | COD-VS              | 2.53             | 2.53             | 2.93             |  |
|                    | Total input         | 4.10             | 4.10             | 4.37             |  |
| Output, g-COD      | COD-anolyte         | 0.42             | 0.43             | 0.90             |  |
|                    | COD-VS              | 1.99             | 1.88             | 1.78             |  |
|                    | COD-CH <sub>4</sub> | 0.12             | 0.11             | 0.11             |  |
|                    | Total output        | 2.53             | 2.42             | 2.79             |  |
| Indetermined       | Input-Output        | 1.57             | 1.68             | 1.58             |  |
| Percentage balance | Input base          | 100%             | 100%             | 100%             |  |
|                    | Anolyte             | 10%              | 10%              | 21%              |  |
|                    | VS                  | 49%              | 46%              | 41%              |  |
|                    | CH <sub>4</sub> gas | 3%               | 3%               | 3%               |  |
|                    | Indeterminate       | 38%              | 41%              | 36%              |  |

**Table S2.** Comparison of economic data from MEC systems for hydrogen and methane production.

| MEC design                                                                         | Volume | Influent                                                                                                           | Applied voltage | Performance                                                                                                                                                                                                                                                                                 | Assumptions                                                                                                                                                                                  | Economic information                                                                                                                       | References      |
|------------------------------------------------------------------------------------|--------|--------------------------------------------------------------------------------------------------------------------|-----------------|---------------------------------------------------------------------------------------------------------------------------------------------------------------------------------------------------------------------------------------------------------------------------------------------|----------------------------------------------------------------------------------------------------------------------------------------------------------------------------------------------|--------------------------------------------------------------------------------------------------------------------------------------------|-----------------|
| Cylindrical dual chamber                                                           | 0.4 L  | Acetate, 25 mM<br><br>1100-1700 mg COD L <sup>-1</sup><br><br>0.3 - 6.3 kg COD m <sup>-3</sup> d <sup>-1</sup>     | 1.2 V           | 0.066-0.137 m <sup>3</sup> H <sub>2</sub> m <sup>-2</sup> membrane d <sup>-1</sup><br><br>0.276-0.420 m <sup>3</sup> H <sub>2</sub> kWh <sup>-1</sup><br><br>8.3-11 A m <sup>-2</sup><br>Cathodic efficiency 94%                                                                            | Not reported                                                                                                                                                                                 | Production cost 1.7-2.6 USD kg <sup>-1</sup> H <sub>2</sub><br><br>Revenue<br>0.03-0.12 USD kg <sup>-1</sup> COD (calculated) <sup>a</sup> | An et al. 2013  |
| Up flow anaerobic reactor with a separated cathodic chamber in an inside cylinder. | 1.2 L  | Synthetic fermentation effluent.<br><br>Input COD, not reported.                                                   | 0.8 V           | 0.247 mL CH <sub>4</sub> mL <sup>-1</sup> d <sup>-1</sup><br><br>0.122 m <sup>3</sup> CH <sub>4</sub> kg <sup>-1</sup> COD<br><br>Energy efficiency 400 %<br>Electricity consumption 0.19 x 10 <sup>-3</sup> kWh (total)<br><br>COD removal 49 %                                            | Electricity cost<br><br>0.06892 € kWh <sup>-1</sup>                                                                                                                                          | Revenue<br>0.067 € m <sup>-3</sup> reactor d <sup>-1</sup><br><br>0.02 USD kg <sup>-1</sup> COD (calculated) <sup>b</sup>                  | Cai et al. 2016 |
| Two chamber MEC                                                                    | 0.38 L | Actual digester effluents<br><br>65 % biomass<br><br>21768 mg COD L <sup>-1</sup><br><br>11.1 g VS L <sup>-1</sup> | 0.43 V          | 14.4 mL CH <sub>4</sub> L <sup>-1</sup> d <sup>-1</sup><br><br>Hydrogen production rate <sup>c</sup><br>5.2 mL H <sub>2</sub> L <sup>-1</sup> d <sup>-1</sup><br><br>Energy efficiency (H <sub>2</sub> )<br>336 %<br><br>Electricity consumption<br>0.71 kWh m <sup>-3</sup> H <sub>2</sub> | Sale price<br>5.1 USD kg <sup>-1</sup> H <sub>2</sub> ,<br><br>Sale price<br>0.193 USD m <sup>3</sup> biogas (65 % CH <sub>4</sub> )<br><br>Electricity cost<br>0.0649 USD kWh <sup>-1</sup> | Revenue<br>0.01 USD kg <sup>-1</sup> COD                                                                                                   | This work       |

<sup>a</sup>. From Figure 5 in the reference. Case 1: 265 L H<sub>2</sub> kg<sup>-1</sup> COD. Case 2: 63.75 L H<sub>2</sub> kg<sup>-1</sup> COD. Assuming a hydrogen density of 0.089 kg m<sup>-3</sup>. Assuming a hydrogen price of 5.1 USD kg<sup>-1</sup> H<sub>2</sub>.

<sup>b</sup>. From the value 0.122 m<sup>3</sup> CH<sub>4</sub> kg<sup>-1</sup> COD. Assuming 0.193 USD m<sup>-3</sup> CH<sub>4</sub>

<sup>c</sup> Value from the Gompertz model for 0.43V-65% MEC. Cathode compartment 0.190 L

## References

An J, Lee HS. Implication of endogenous decay current and quantification of soluble microbial products (SMP) in microbial electrolysis cells. *RSC Advances*. 2013;3(33):14021-14028. <https://doi.org/10.1039/c3ra41116h>.

Cai WW, Han TT, Guo ZC, Varrone C, Wang AJ, Liu WZ. Methane production enhancement by an independent cathode in integrated anaerobic reactor with microbial electrolysis. *Bioresource Technology*. May 2016;208:13-18. <https://doi.org/10.1016/j.biortech.2016.02.028>.
